## Correction

# Correction: IL-10 Is Significantly Involved in HSP70-Regulation of Experimental Subretinal Fibrosis

The *PLOS ONE* Staff

A Funding statement is incorrectly omitted from the article. The Funding statement should read: "This work was supported by JSPS KAKENHI Grant Number 23689071 [grant-in-aid for Young Scientists (A) (A.T.)], Grant Number 24791859 [grant-in-aid for Young Scientists (B) (T.Y.)], Grant Number 10294943 [grants B (K-H.S.)], and Grant Number 23592573 [grants C (Y.O.)] from the Ministry of Education, Science, Sports and Culture, Japan."

## Reference

1. Yang Y, Takeda A, Yoshimura T, Oshima Y, Sonoda K-H, et al. (2013) IL-10 Is Significantly Involved in HSP70-Regulation of Experimental Subretinal Fibrosis. *PLoS ONE* 8(12): e80288. doi:10.1371/journal.pone.0080288

**Citation:** The *PLOS ONE* Staff (2014) Correction: IL-10 Is Significantly Involved in HSP70-Regulation of Experimental Subretinal Fibrosis. *PLoS ONE* 9(3): e91197. doi:10.1371/journal.pone.0091197

**Published:** March 17, 2014

**Copyright:** © 2014 The *PLOS ONE* Staff. This is an open-access article distributed under the terms of the Creative Commons Attribution License, which permits unrestricted use, distribution, and reproduction in any medium, provided the original author and source are credited.
